# Supplementary material for: Polymorphism in carboxamide compounds with high-Z′ crystal structures
Source: Royal Society of Chemistry journal article supplement (doi:10.1039/d2ce01171a), 2022-11-24
Supplement: d2ce01171a1.pdf [file d2ce01171a1.pdf]

## Polymorphism In Carboxamide Compounds with High-Z' Crystal Structure

Fatemeh Tavakoli-Quchani,<sup>a</sup> Alireza Salimi <sup>\*a</sup>, Behrouz Notash <sup>b</sup> Ali Samie <sup>a</sup>, and Jered C. Garrison <sup>c</sup>

a. Department of Chemistry, Faculty of Science, Ferdowsi University of Mashhad, Mashhad, Iran.

b. Faculty of Chemistry, Shahid Beheshti University, G.C., P.O. Box 19396-4716, Tehran, Iran.

c. Department of Pharmaceutical Sciences, University of Nebraska Medical Center, 985830, Nebraska, United States.

### Supporting Information

#### S0. List of Contents

|                    |                                                                                                   |            |
|--------------------|---------------------------------------------------------------------------------------------------|------------|
| <b>Figure S0.</b>  | List of Contents                                                                                  | <b>P.1</b> |
| <b>Figure S1.</b>  | mass spectroscopy analysis for N-(thiazole-2-yl) pyrazine-2-carboxamide.                          | <b>P.2</b> |
| <b>Figure S2.</b>  | CHN elemental analysis for N-(thiazole-2-yl) pyrazine-2-carboxamide.                              | <b>P.2</b> |
| <b>Figure S3.</b>  | <sup>1</sup> H-NMR spectrums for N-(thiazole-2-yl) pyrazine-2-carboxamide.                        | <b>P.3</b> |
| <b>Figure S4.</b>  | <sup>13</sup> C-NMR spectrums for N-(thiazole-2-yl) pyrazine-2-carboxamide.                       | <b>P.3</b> |
| <b>Figure S5.</b>  | The overlay of symmetry-independent molecules of <b>I</b> (a), <b>II</b> (b), and <b>III</b> (c). | <b>P.4</b> |
| <b>Figure S6.</b>  | Overlay of PXRD plots for <b>I</b> , <b>II</b> , and <b>III</b> .                                 | <b>P.4</b> |
| <b>Figure S7.</b>  | Overlay of FT-IR plots for <b>I</b> , <b>II</b> , and <b>III</b> .                                | <b>P.4</b> |
| <b>Figure S8.</b>  | Overlay of TGA plots for <b>I</b> , <b>II</b> , and <b>III</b> .                                  | <b>P.5</b> |
| <b>Figure S9.</b>  | Overlay of DSC plots for <b>I</b> , <b>II</b> , and <b>III</b> .                                  | <b>P.5</b> |
| <b>Figure S10.</b> | Schematic representation of the electron density around a chalcogen atom.                         | <b>P.6</b> |
| <b>Table S1.</b>   | Intermolecular interactions geometrical parameters and energies for all of the polymorphs.        | <b>P.6</b> |
| <b>Table S2.</b>   | Intramolecular interactions geometrical parameters in <b>I</b> , <b>II</b> , and <b>III</b> .     | <b>P.7</b> |
| <b>Table S3.</b>   | The results of CSD-study.                                                                         | <b>P.7</b> |

**Figure S1.** mass spectroscopy analysis for N-(thiazole-2-yl) pyrazine-2-carboxamide.

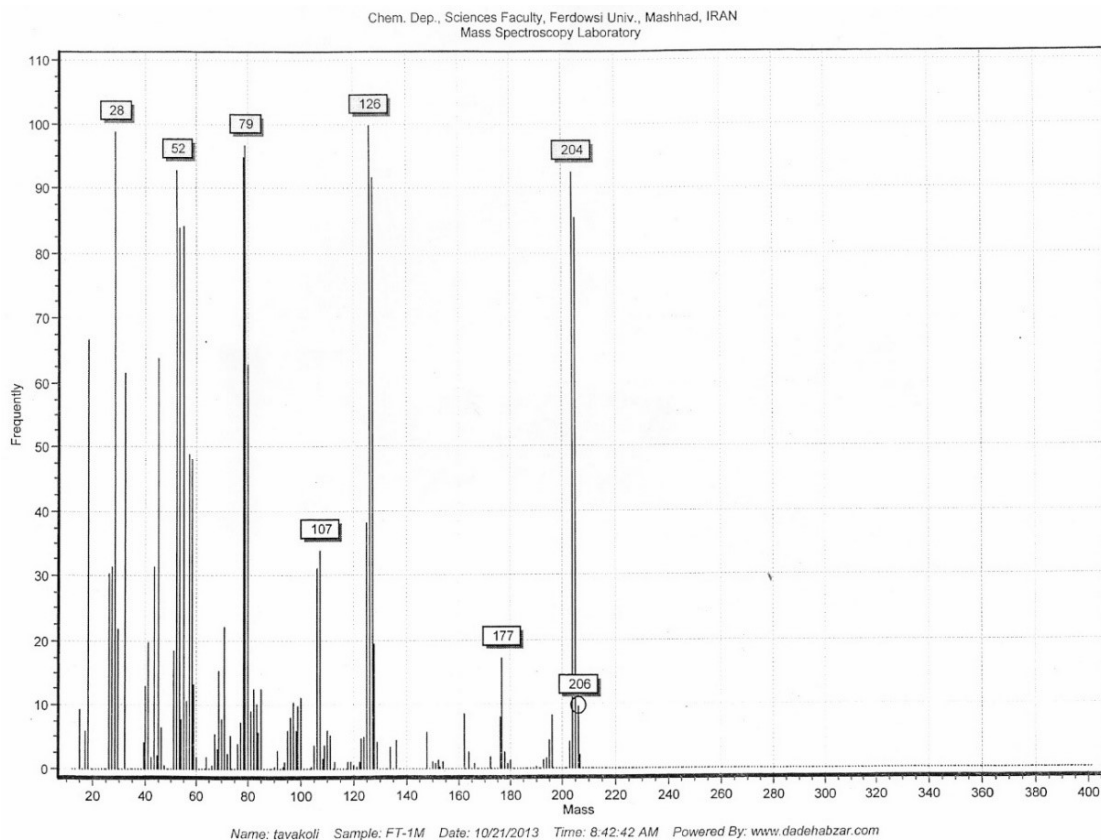

**Figure S2.** CHN elemental analysis for N-(thiazole-2-yl) pyrazine-2-carboxamide.

**Eager 300 Summarize Results**

Date : 04/01/2015 at 08:27:27  
Method Name : NCHS  
Method Filename : Copy of Copy of N C H S-bkp .mth

| Filename       | AS Method | Vial        |      |       |       |     |
|----------------|-----------|-------------|------|-------|-------|-----|
| tavakoli-23    |           |             |      |       |       |     |
| #              | Group     | Sample Name | Type | Weig. | Pro.F | --- |
| 23             | 1         | FT-L        | UNK  | 1.002 | 6.25  | --- |
| Component name | Element   | %           |      |       |       |     |
| Nitrogen%      |           | 27.31689453 |      |       |       |     |
| Carbon%        |           | 48.17142868 |      |       |       |     |
| Hydrogen%      |           | 2.829131365 |      |       |       |     |
| Sulphur%       |           | 15.1317749  |      |       |       |     |

1 Sample(s) in Group No : 1

| Component Name | Average     |
|----------------|-------------|
| Nitrogen%      | 27.31689453 |
| Carbon%        | 48.17142868 |
| Hydrogen%      | 2.829131365 |
| Sulphur%       | 15.1317749  |

Figure S3. <sup>1</sup>H-NMR spectrums for N-(thiazole-2-yl) pyrazine-2-carboxamide.

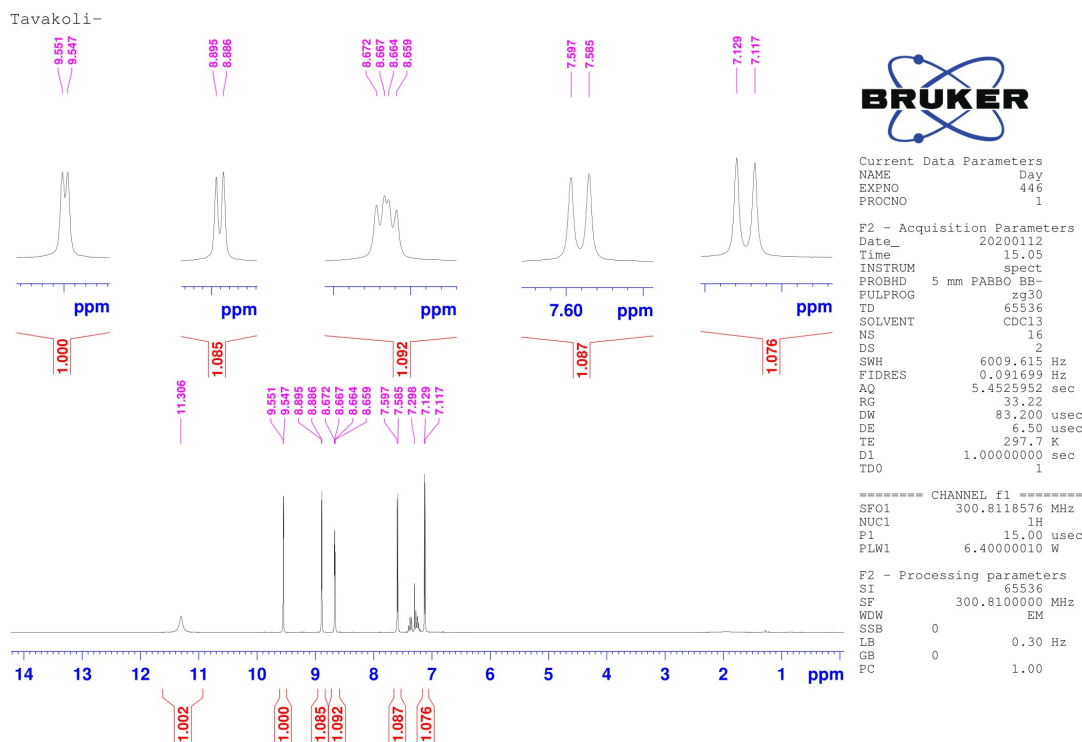

Figure S4. <sup>13</sup>C-NMR spectrums for N-(thiazole-2-yl) pyrazine-2-carboxamide.

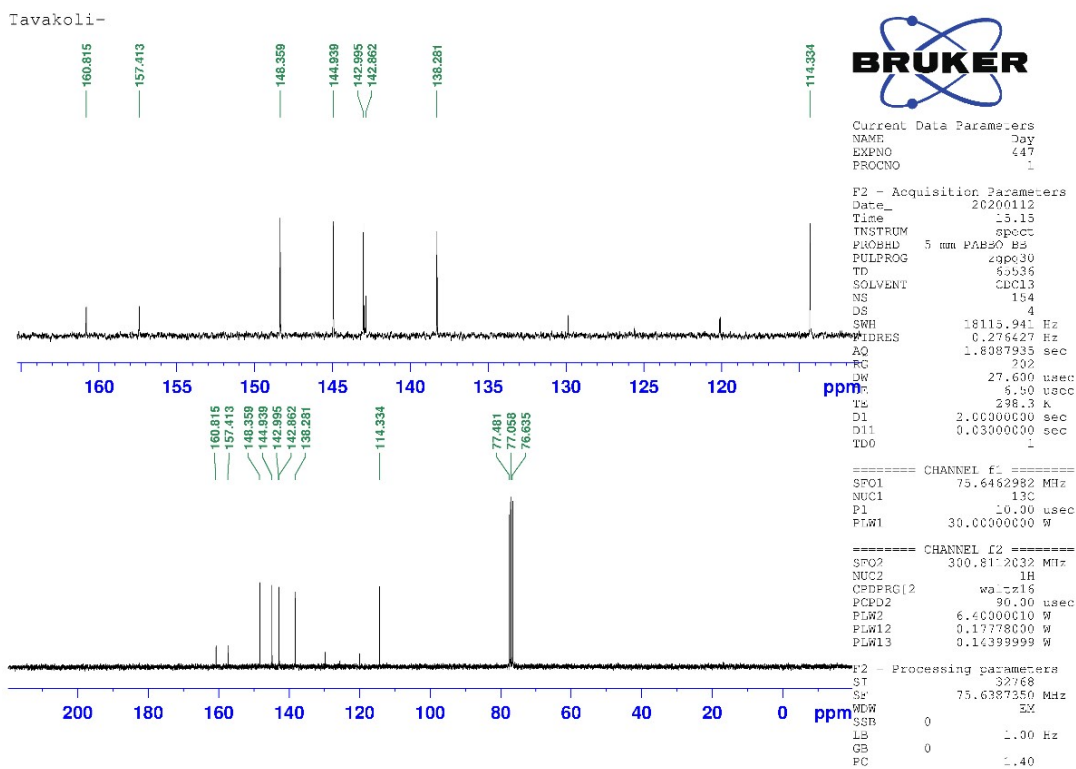

**Figure S5.** The overlay of symmetry independent molecules of **I** (a), **II** (b), and **III** (c).

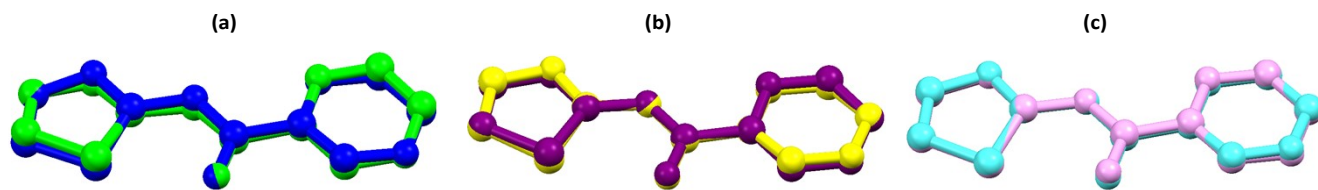

**Figure S6.** Overlay of PXRD plots for **I**, **II** and **III**.

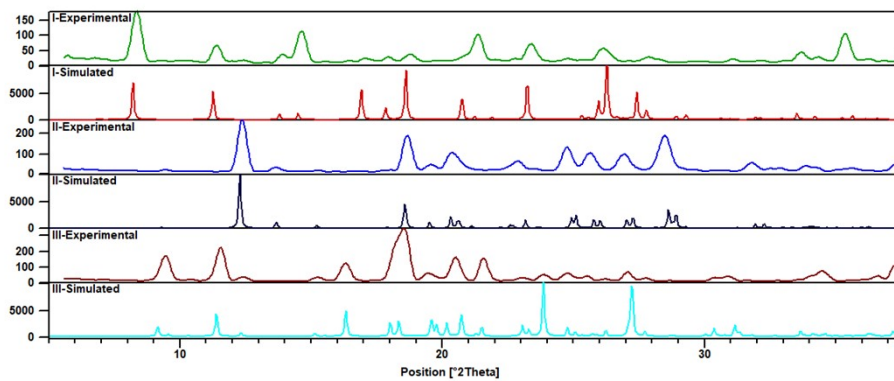

**Figure S7.** Overlay of FT-IR plots for **I**, **II** and **III**.

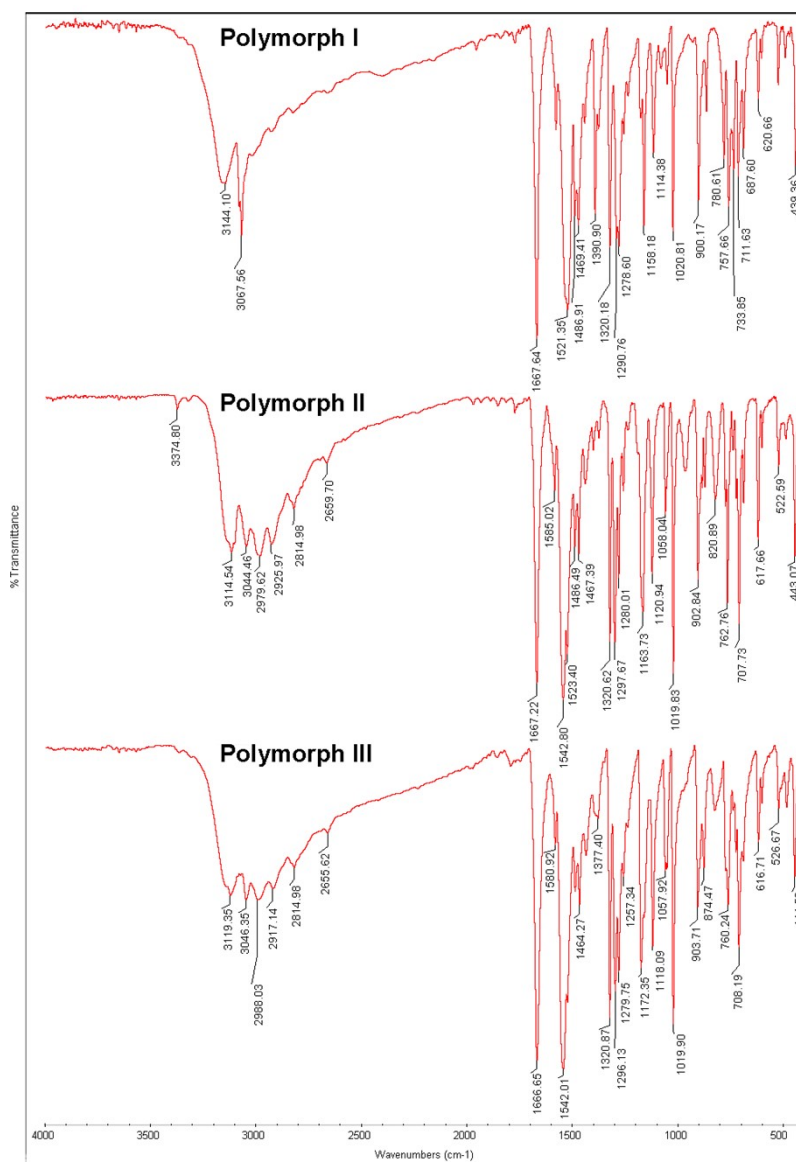

Figure S8. Overlay of TGA plots for I, II and III.

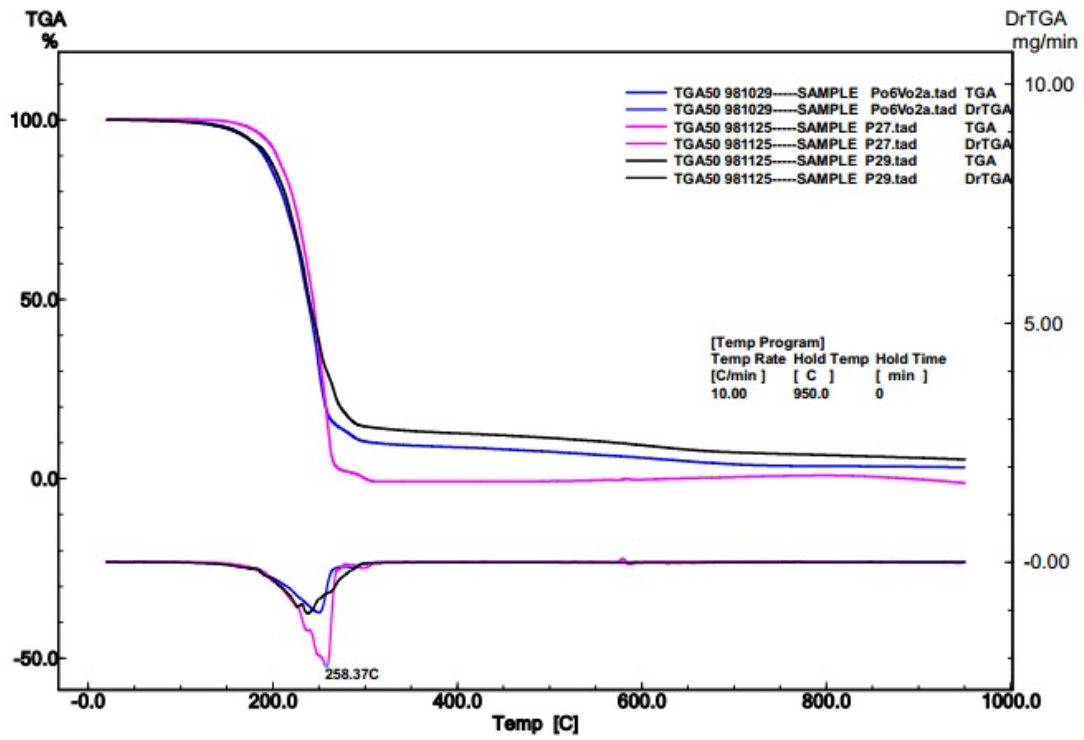

Figure S9. Overlay of DSC plots for II and III.

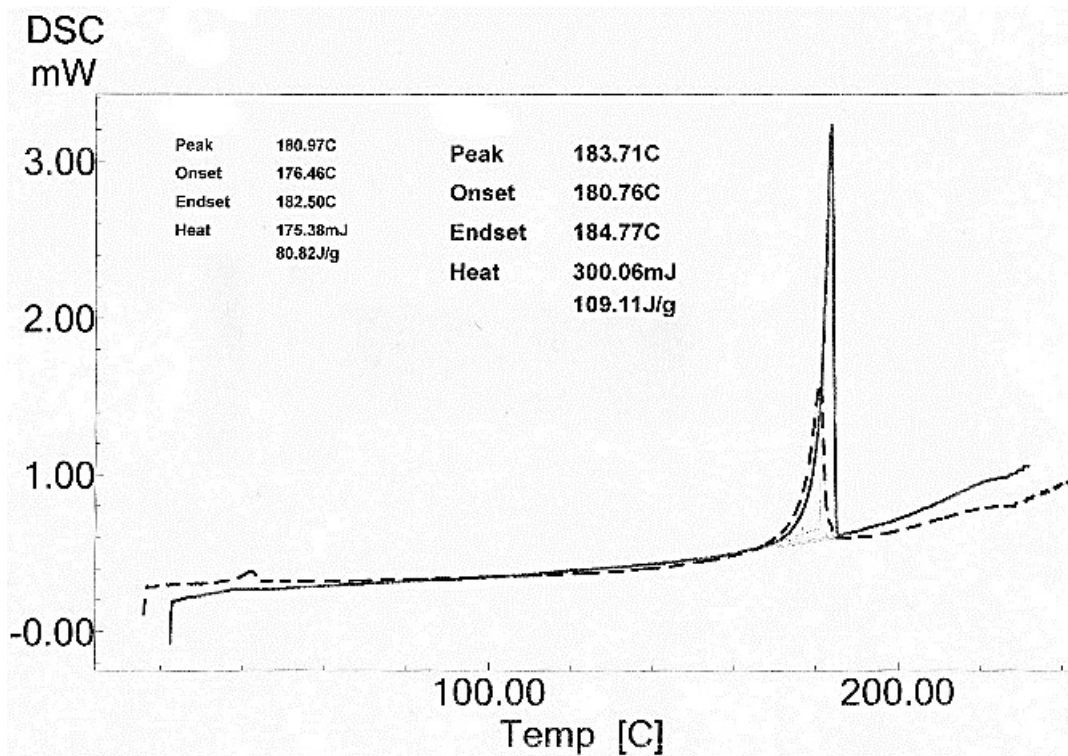

Figure S10. Schematic representation of the electron density around a chalcogen atom.

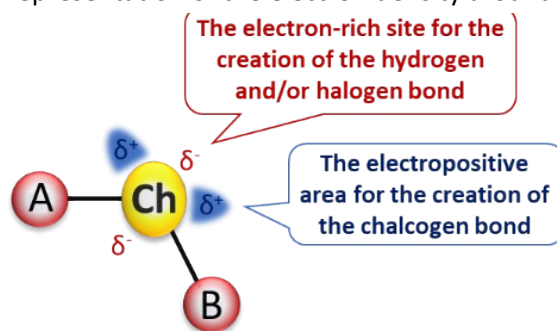

Ch: O, S, Se, Te, and Po; A, B: C, N, etc.

Table S1. Intermolecular interactions geometrical parameters and energies for all of the polymorphs.

| Dimers                                           | Energy (kcal.mole <sup>-1</sup> ) | Interactions                                           | B <sup>*</sup> ...A (Å) | D...A (Å) | <D-B <sup>*</sup> ...A | Symmetry operation |
|--------------------------------------------------|-----------------------------------|--------------------------------------------------------|-------------------------|-----------|------------------------|--------------------|
| <b><i>P</i><sub>bca</sub></b>                    |                                   |                                                        |                         |           |                        |                    |
| Dimer 1I-SR                                      | -7.55                             | Cg <sub>thia</sub> ...Cg <sub>pz</sub>                 | 3.683                   | -         | 9                      | -                  |
| Dimer 2I-SI                                      | -7.47                             | N <sub>1</sub> ...N <sub>6</sub> -H <sub>6n</sub>      | 2.4278(4)               | 3.1125(5) | 161                    | -0.5+x, 2.5-y, 1-z |
| Dimer 2I-SI                                      | -7.47                             | N <sub>5</sub> ...N <sub>2</sub> -H <sub>2n</sub>      | 2.2180(3)               | 3.1128(5) | 160                    | -0.5+x, 2.5-y, 1-z |
| Dimer 2I-SI                                      | -7.47                             | N <sub>7</sub> ...C <sub>2</sub> -H <sub>2</sub>       | 2.5719(4)               | 3.2858(5) | 134                    | -0.5+x, 2.5-y, 1-z |
| Dimer 2I-SI                                      | -7.47                             | N <sub>3</sub> ...C <sub>10</sub> -H <sub>10</sub>     | 2.5404(4)               | 3.2059(4) | 129                    | -0.5+x, 2.5-y, 1-z |
| Dimer 3I-SI                                      | -5.04                             | Cg <sub>thia</sub> ...Cg <sub>pz</sub>                 | 3.979                   | -         | 10                     | -                  |
| Dimer 3I-SI                                      | -5.04                             | Cg <sub>pz</sub> ...C <sub>12</sub> -N <sub>6</sub>    | 3.713                   | -         | 11                     | -                  |
| Dimer 4I-SI                                      | -3.37                             | O <sub>1</sub> ...C <sub>15</sub> -H <sub>15</sub>     | 2.6183(5)               | 3.2269(6) | 124                    | x, y, z            |
| Dimer 4I-SI                                      | -3.37                             | S <sub>1</sub> ...C <sub>15</sub> -H <sub>15</sub>     | 3.0316(4)               | 3.9589(6) | 174                    | x, y, z            |
| Dimer 5I-SR                                      | -3.35                             | C <sub>16</sub> -H <sub>16</sub> ...Cg <sub>thia</sub> | 3.130                   | -         | 173                    | -                  |
| Dimer 6I-SI                                      | -2.94                             | C <sub>7</sub> -H <sub>7</sub> ...O <sub>2</sub>       | 2.6636(5)               | 3.3367(5) | 130                    | x, 2.5-y, 0.5+z    |
| Dimer 6I-SI                                      | -2.94                             | C <sub>7</sub> -H <sub>7</sub> ...S <sub>2</sub>       | 3.0291(4)               | 3.9570(6) | 175                    | x, 2.5-y, -0.5+z   |
| Dimer 7I-SR                                      | -1.60                             | C <sub>11</sub> -H <sub>11</sub> ...N <sub>8</sub>     | 2.5538(4)               | 3.4139(5) | 154                    | 0.5+x, y, 0.5-z    |
| Dimer 8I-SR                                      | -1.47                             | C <sub>3</sub> -H <sub>3</sub> ...N <sub>4</sub>       | 2.4620(3)               | 3.3707(5) | 166                    | -0.5+x, 2.5-y, 1-z |
| <b><i>P</i><sub>2<sub>1</sub></sub>/<i>c</i></b> |                                   |                                                        |                         |           |                        |                    |
| Dimer 1II-SR                                     | -6.96                             | C <sub>8</sub> -H <sub>8</sub> ...N <sub>3</sub>       | 2.6056(4)               | 3.2409(6) | -                      | -x, 0.5+y, 1.5-z   |
| Dimer 1II-SR                                     | -6.96                             | C <sub>7</sub> -H <sub>7</sub> ...N <sub>1</sub>       | 2.5082(4)               | 3.2262(7) | -                      | -x, 0.5+y, 1.5-z   |
| Dimer 1II-SR                                     | -6.96                             | N <sub>2</sub> -H <sub>2n</sub> ...N <sub>4</sub>      | 2.1869(3)               | 3.0065(5) | -                      | -x, -0.5+y, 1.5-z  |
| Dimer 2II-SR                                     | -6.80                             | C <sub>15</sub> -H <sub>15</sub> ...N <sub>5</sub>     | 2.5783(4)               | 3.2701(5) | -                      | 1-x, 0.5+y, 1.5-z  |
| Dimer 2II-SR                                     | -6.80                             | C <sub>16</sub> -H <sub>16</sub> ...N <sub>7</sub>     | 2.5674(4)               | 3.2105(6) | -                      | 1-x, 0.5+y, 1.5-z  |
| Dimer 2II-SR                                     | -6.80                             | N <sub>6</sub> -H <sub>6n</sub> ...N <sub>8</sub>      | 2.2020(3)               | 3.0195(5) | 159                    | 1-x, -0.5+y, 1.5-z |
| Dimer 3II-SR                                     | -6.74                             | C <sub>4</sub> -N <sub>2</sub> ...Cg <sub>pz</sub>     | 4.485                   | -         | 17                     | -                  |
| Dimer 4II-SR                                     | -6.17                             | C <sub>12</sub> -N <sub>6</sub> ...Cg <sub>pz</sub>    | 4.730                   | -         | 14                     | -                  |
| Dimer 5II-SR                                     | -5.42                             | C <sub>4</sub> -N <sub>2</sub> ...Cg <sub>thia</sub>   | 3.322                   | -         | 7                      | -                  |
| Dimer 6II-SR                                     | -4.91                             | C <sub>12</sub> -N <sub>6</sub> ...Cg <sub>thia</sub>  | 3.452                   | -         | 7                      | -                  |
| Dimer 7II-SR                                     | -2.49                             | Cg <sub>pz</sub> ...Cg <sub>pz</sub>                   | 3.820                   | -         | 0                      | -                  |
| Dimer 8II-SI                                     | -1.25                             | C <sub>9</sub> -S <sub>2</sub> ...S <sub>1</sub>       | 3.7431(6)               | 4.8648(8) | 121                    | x, 1.5-y, 0.5+z    |
| Dimer 8II-SI                                     | -1.25                             | C <sub>12</sub> -O <sub>2</sub> ...S <sub>1</sub>      | 3.5139(8)               | 4.4799(8) | 138                    | x, 1.5-y, 0.5+z    |
| Dimer 9II-SI                                     | -0.86                             | C <sub>10</sub> -H <sub>10</sub> ...S <sub>1</sub>     | 2.8838(4)               | 3.7915(6) | 165                    | x, y, z            |
| Dimer 9II-SI                                     | -0.86                             | C <sub>10</sub> -H <sub>10</sub> ...O <sub>1</sub>     | 2.6040(5)               | 3.3281(5) | 135                    | x, y, z            |
| <b><i>P</i><sub>2<sub>1</sub></sub></b>          |                                   |                                                        |                         |           |                        |                    |
| Dimer 1III-SI                                    | -7.42                             | C <sub>7</sub> -H <sub>7</sub> ...N <sub>5</sub>       | 2.5649(1)               | 3.2451(1) | 129                    | x, y, z            |
| Dimer 1III-SI                                    | -7.42                             | C <sub>8</sub> -H <sub>8</sub> ...N <sub>7</sub>       | 2.4755(1)               | 3.1649(1) | 129                    | x, y, z            |
| Dimer 1III-SI                                    | -7.42                             | N <sub>6</sub> -H <sub>6n</sub> ...N <sub>4</sub>      | 2.1231(1)               | 2.9684(1) | 161                    | x, y, z            |
| Dimer 2III-SR                                    | -6.20                             | C <sub>4</sub> -N <sub>2</sub> ...Cg <sub>pz</sub>     | 3.578                   | -         | 6                      | -                  |
| Dimer 2III-SR                                    | -6.20                             | C <sub>4</sub> -N <sub>2</sub> ...Cg <sub>thia</sub>   | 3.710                   | -         | 4                      | -                  |
| Dimer 3III-SI                                    | -3.75                             | Cg <sub>thia</sub> ...Cg <sub>pz</sub>                 | 3.698                   | -         | 7                      | -                  |
| Dimer 4III-SR                                    | -3.15                             | C <sub>9</sub> -S <sub>2</sub> ...S <sub>2</sub>       | 3.7627(1)               | 4.0522(2) | 162                    | -1-x, 0.5+y, -1-z  |
| Dimer 4III-SR                                    | -3.15                             | C <sub>9</sub> -S <sub>2</sub> ...O <sub>2</sub>       | 3.3108(2)               | 4.5265(2) | 152                    | -1-x, -0.5+y, -1-z |
| Dimer 5III-SR                                    | -2.41                             | C <sub>1</sub> -S <sub>1</sub> ...S <sub>1</sub>       | 3.6940(1)               | 4.9677(2) | 135                    | -1-x, -0.5+y, -z   |
| Dimer 5III-SR                                    | -2.41                             | C <sub>1</sub> -S <sub>1</sub> ...O <sub>1</sub>       | 3.2786(2)               | 4.9597(3) | 162                    | -1-x, -0.5+y, -z   |
| Dimer 6III-SR                                    | -1.22                             | C <sub>2</sub> -H <sub>2</sub> ...Cg <sub>thia</sub>   | 3.534                   | -         | 141                    | -                  |

B: H (for hydrogen bond), S (for chalcogen bond), N (for amide  $\cdots\pi$ ), and Cg (for  $\pi\cdots\pi$  interaction).

**Table S2.** Intramolecular interactions geometrical parameters in I, II, and III.

| Polymorph | Interactions                                      | B <sup>*</sup> ...A (Å) | <D-B...A (°) |
|-----------|---------------------------------------------------|-------------------------|--------------|
| I         | C <sub>3</sub> -S <sub>1</sub> ...O <sub>1</sub>  | 2.6532 (5)              | 164.280 (13) |
|           | C <sub>11</sub> -S <sub>2</sub> ...O <sub>2</sub> | 2.6562 (5)              | 162.858 (13) |
|           | N <sub>2</sub> -H <sub>2n</sub> ...N <sub>3</sub> | 2.3770 (4)              | 102.595 (15) |
|           | N <sub>6</sub> -H <sub>6n</sub> ...N <sub>7</sub> | 2.5043 (4)              | 103.391 (19) |
| II        | C <sub>3</sub> -S <sub>1</sub> ...O <sub>1</sub>  | 2.7037 (7)              | 161.786 (9)  |
|           | C <sub>11</sub> -S <sub>2</sub> ...O <sub>2</sub> | 2.7000 (5)              | 162.251 (11) |
|           | N <sub>2</sub> -H <sub>2n</sub> ...N <sub>3</sub> | 2.3831 (7)              | 106.158 (15) |
|           | N <sub>6</sub> -H <sub>6n</sub> ...N <sub>7</sub> | 2.3514 (5)              | 107.617 (19) |
| III       | C <sub>3</sub> -S <sub>1</sub> ...O <sub>1</sub>  | 2.7168 (1)              | 162.028 (2)  |
|           | C <sub>11</sub> -S <sub>2</sub> ...O <sub>2</sub> | 2.6987 (2)              | 162.356 (3)  |
|           | N <sub>2</sub> -H <sub>2n</sub> ...N <sub>3</sub> | 2.3813 (1)              | 106.383 (4)  |
|           | N <sub>6</sub> -H <sub>6n</sub> ...N <sub>7</sub> | 2.3914 (1)              | 106.295 (4)  |

B: H (for hydrogen bond) and S (for chalcogen bond)

**Table S3.** The results of CSD-study.

- i. Compound
- ii. Number of polymorphs
- iii. Ref code
- iv. Polymorphs
- v. Ref. Number
- vi. Space group
- vii. Z'
- viii. Number of rmsd
- ix. Involved Polymorphs in rmsd-[r]-crystal Calculation
- x. Max rmsd-[r]-crystal

| i  | ii | iii    | iv | v         | vi           | vii | viii | ix             | x      |
|----|----|--------|----|-----------|--------------|-----|------|----------------|--------|
| 1  | 2  | ABIZAP | 1  | ABIZAP 00 | $P\bar{1}$   | 2   | 1    | ABIZAP 00-01   | 0.0599 |
|    |    |        | 2  | ABIZAP 01 | $P2_1/n$     | 2   |      |                |        |
| 2  | 2  | AHADAQ | 3  | AHADAQ 00 | $P1$         | 4   | 2    | AHADAQ 00-01   | 0.0976 |
|    |    |        | 4  | AHADAQ 01 | $Fdd2$       | 2   |      |                |        |
| 3  | 2  | AHEGEZ | 5  | AHEGEZ 00 | $P2_1/n$     | 2   | 3    | AHEGEZ 00-01   | 0.3204 |
|    |    |        | 6  | AHEGEZ 01 | $P\bar{1}$   | 2   |      |                |        |
| 4  | 2  | AMUQOQ | 7  | AMUQOQ 00 | $P2_1$       | 2   | 4    | AMUQOQ 00-01   | 0.2084 |
|    |    |        | 8  | AMUQOQ 01 | $P2_12_12_1$ | 2   |      |                |        |
| 5  | 3  | ANONEX | 9  | ANONEX 00 | $P1$         | 2   | 5    | ANONEX 00-01   | 0.4100 |
|    |    |        | 10 | ANONEX 01 | $P1$         | 2   | 6    | ANONEX 00-02   | 0.6807 |
|    |    |        | 11 | ANONEX 02 | $P1$         | 2   | 7    | ANONEX 01-02   | 0.6792 |
| 6  | 2  | ASITEC | 12 | ASITEC 00 | $Pbca$       | 3   | 8    | ASITEC 00-01   | 2.3474 |
|    |    |        | 13 | ASITEC 01 | $P2_1/c$     | 2   |      |                |        |
| 7  | 2  | AWICEQ | 14 | AWICEQ 00 | $P2_1/n$     | 2   | 9    | AWICEQ 00 - 01 | 0.0489 |
|    |    |        | 15 | AWICEQ 01 | $P2_1/n$     | 2   |      |                |        |
| 8  | 2  | AZESEE | 16 | AZESEE 00 | $P2_1/c$     | 2   | 10   | AZESEE 00-01   | 0.5329 |
|    |    |        | 17 | AZESEE 01 | $P2_1/n$     | 2   |      |                |        |
| 9  | 2  | BAJIU  | 18 | BAJIU 01  | $P\bar{1}$   | 2   | 11   | BAJIU 01-02    | 0.0235 |
|    |    |        | 19 | BAJIU 02  | $P\bar{1}$   | 2   |      |                |        |
| 10 | 2  | BEDVAK | 20 | BEDVAK 00 | $P\bar{1}$   | 4   | 12   | BEDVAK 00-01   | 0.4690 |
|    |    |        | 21 | BEDVAK 01 | $P\bar{1}$   | 2   |      |                |        |
| 11 | 2  | BEDVEO | 22 | BEDVEO 00 | $P\bar{1}$   | 4   | 13   | BEDVEO 00-01   | 0.4765 |
|    |    |        | 23 | BEDVEO 01 | $P\bar{1}$   | 2   |      |                |        |
| 12 | 4  | BENZIE | 24 | BENZIE 01 | $P\bar{1}$   | 3   | 14   | BENZIE 01-02   | 0.2546 |
|    |    |        | 25 | BENZIE 02 | $P2_1/c$     | 1.5 | 15   | BENZIE 01-03   | 0.3197 |
|    |    |        | 26 | BENZIE 03 | $P2_1/n$     | 4.5 | 16   | BENZIE 01-04   | 0.2664 |
|    |    |        | 27 | BENZIE 04 |              | 4.5 | 17   | BENZIE 02-03   | 0.3542 |

|    |   |        |    |           |                   |   |    |                |        |
|----|---|--------|----|-----------|-------------------|---|----|----------------|--------|
|    |   |        |    |           | $P_{2_1/n}$       |   | 18 | BENZIE 02-04   | 0.3007 |
|    |   |        |    |           |                   |   | 19 | BENZIE 03-04   | 0.3536 |
| 13 | 2 | BETJAL | 28 | BETJAL 00 | $p\bar{1}$        | 2 | 20 | BETJAL 00-01   | 1.0126 |
|    |   |        | 29 | BETJAL 01 | $p\bar{1}$        | 2 |    |                |        |
| 14 | 2 | BUFNEV | 30 | BUFNEV 00 | $p\bar{1}$        | 2 | 21 | BUFNEV 00 - 01 | 0.1030 |
|    |   |        | 31 | BUFNEV 01 | $p\bar{1}$        | 2 |    |                |        |
| 15 | 2 | BIPCOS | 32 | BIPCOS 00 | $P_{4_1,2_1,2}$   | 4 | 22 | BIPCOS 00-01   | 0.1225 |
|    |   |        | 33 | BIPCOS 01 | $P_1$             | 8 |    |                |        |
| 16 | 2 | CARZIF | 34 | CARZIF 03 | $P_n$             | 8 | 23 | CARZIF 03 - 07 | 0.8406 |
|    |   |        | 35 | CARZIF 07 | $P_{2_1,2_1,2_1}$ | 2 |    |                |        |
| 17 | 2 | CHOLEC | 36 | CHOLEC 01 | $P_{2_1}$         | 2 | 24 | CHOLEC 01-03   | 0.6340 |
|    |   |        | 37 | CHOLEC 03 | $P_{2_1}$         | 4 |    |                |        |
| 18 | 2 | CLPHOL | 38 | CLPHOL 12 | $P_{2_1/c}$       | 2 | 25 | CLPHOL 12-13   | 0.0100 |
|    |   |        | 39 | CLPHOL 13 | $P_{2_1/c}$       | 2 |    |                |        |
| 19 | 2 | CRESOL | 40 | CRESOL 01 | $P_{2_1/c}$       | 2 | 26 | CRESOL 01-02   | 0.0321 |
|    |   |        | 41 | CRESOL 02 | $C_{2/c}$         | 3 |    |                |        |
| 20 | 2 | CUKHUM | 42 | CUKHUM 00 | $P_{bca}$         | 2 | 27 | CUKHUM 00-01   | 0.3304 |
|    |   |        | 43 | CUKHUM 01 | $P_{2_1/c}$       | 4 |    |                |        |
| 21 | 2 | CUNKUS | 44 | CUNKUS 00 | $P_{2_1/n}$       | 2 | 28 | CUNKUS 00-01   | 0.7978 |
|    |   |        | 45 | CUNKUS 01 | $p\bar{1}$        | 6 |    |                |        |
| 22 | 2 | CYACAC | 46 | CYACAC 00 | $p\bar{1}$        | 2 | 29 | CYACAC 00-01   | 0.0604 |
|    |   |        | 47 | CYACAC 01 | $P_{2_1/c}$       | 3 |    |                |        |
| 23 | 2 | DCLNAP | 48 | DCLNAP 01 | $P_{b2_1a}$       | 2 | 30 | DCLNAP 01-02   | 0.0324 |
|    |   |        | 49 | DCLNAP 02 | $p\bar{1}$        | 2 |    |                |        |
| 24 | 2 | DOKNOI | 50 | DOKNOI 00 | $P_{ca2_1}$       | 2 | 31 | DOKNOI 00-01   | 0.6188 |
|    |   |        | 51 | DOKNOI 01 | $p\bar{1}$        | 2 |    |                |        |
| 25 | 2 | DOVGEC | 52 | DOVGEC 00 | $P_{2_1}$         | 2 | 32 | DOVGEC 00-01   | 0.8815 |
|    |   |        | 53 | DOVGEC 01 | $P_{2_1}$         | 2 |    |                |        |
| 26 | 2 | DPGUAN | 54 | DPGUAN 00 | $P_{112_1/b}$     | 2 | 33 | DPGUAN 00-01   | 0.2150 |
|    |   |        | 55 | DPGUAN 01 | $P_{2_1,2_1,2_1}$ | 2 |    |                |        |
| 27 | 2 | DUQJOP | 56 | DUQJOP 00 | $P_{2_1}$         | 4 | 34 | DUQJOP 00-01   | 0.823  |
|    |   |        | 57 | DUQJOP 01 | $P_{2_1/n}$       | 2 |    |                |        |
| 28 | 2 | DUXSUK | 58 | DUXSUK 00 | $P_{2_1/c}$       | 3 | 35 | DUXSUK 00-05   | 0.0640 |
|    |   |        | 59 | DUXSUK 05 | $P_{2_1/c}$       | 3 |    |                |        |
| 29 | 2 | EBIDUP | 60 | EBIDUP 01 | $P_{2_1/n}$       | 4 | 36 | EBIDUP 00 - 01 | 0.5103 |
|    |   |        | 61 | EBIDUP 00 | $P_{2_1/c}$       | 2 |    |                |        |
| 30 | 2 | EOPDO  | 62 | EOPDO 00  | $P_{2_1/c}$       | 2 | 37 | EOPDO 00-01    | 0.0312 |
|    |   |        | 63 | EOPDO 01  | $P_{2_1/c}$       | 2 |    |                |        |
| 31 | 2 | EVAZEG | 64 | EVAZEG 00 | $C_{2/c}$         | 2 | 38 | EVAZEG 00-01   | 0.8580 |
|    |   |        | 65 | EVAZEG 01 | $P_{2_1/n}$       | 2 |    |                |        |
| 32 | 2 | EWAMAR | 66 | EWAMAR 00 | $I_4$             | 2 | 39 | EWAMAR 00-01   | 0.0415 |
|    |   |        | 67 | EWAMAR 01 | $P_{2_1,2_1}$     | 8 |    |                |        |
| 33 | 2 | EWAZOT | 68 | EWAZOT 00 | $p\bar{1}$        | 2 | 40 | EWAZOT 00-01   | 0.4299 |
|    |   |        | 69 | EWAZOT 01 | $p\bar{1}$        | 2 |    |                |        |
| 34 | 2 | FACCOB | 70 | FACCOB 01 | $P_{2_1/b11}$     | 2 | 41 | FACCOB 01-02   | 0.0724 |
|    |   |        | 71 | FACCOB 02 | $P_{2_1/c}$       | 3 |    |                |        |
| 35 | 2 | FEGHAA | 72 | FEGHAA 06 | $P_{2_1}$         | 2 | 42 | FEGHAA 06-07   | 0.7573 |
|    |   |        | 73 | FEGHAA 07 | $P_{2_1}$         | 2 |    |                |        |
| 36 | 2 | FEXRIK | 74 | FEXRIK 00 | $P_{2_1}$         | 2 | 43 | FEXRIK 00-01   | 0.2831 |
|    |   |        | 75 | FEXRIK 01 | $p\bar{1}$        | 4 |    |                |        |
| 37 | 2 | FIHNUH | 76 | FIHNUH 00 | $P_{2_1}$         | 2 | 44 | FIHNUH 00-01   | 0.3109 |
|    |   |        | 77 | FIHNUH 01 | $P_{2_1/c}$       | 2 |    |                |        |
| 38 | 2 | FINQIF | 78 | FINQIF 00 | $P_{2_1}$         | 4 | 45 | FINQIF 00-01   | 0.1476 |
|    |   |        | 79 | FINQIF 01 | $p\bar{1}$        | 3 |    |                |        |
| 39 | 2 | GADSIO | 80 | GADSIO 00 | $P_{2_1/c}$       | 2 | 46 | GADSIO 00-01   | 0.1106 |
|    |   |        | 81 | GADSIO 01 | $P_{2_1/n}$       | 2 |    |                |        |
| 40 | 2 | GINKIZ | 82 | GINKIZ 00 | $P_{2_1/c}$       | 2 | 47 | GINKIZ 00-01   | 0.7377 |
|    |   |        | 83 | GINKIZ 01 | $p\bar{1}$        | 2 |    |                |        |
| 41 | 2 | GOCJIT | 84 | GOCJIT 00 | $P_{2_1}$         | 2 | 48 | GOCJIT 00-01   | 0.5086 |
|    |   |        | 85 | GOCJIT 01 | $P_{2_1/n}$       | 3 |    |                |        |
| 42 | 2 | GUJNAA | 86 | GUJNAA 00 | $P_{2_1}$         | 2 | 49 | GUJNAA 00-01   | 0.2550 |
|    |   |        | 87 | GUJNAA 01 | $p\bar{1}$        | 3 |    |                |        |
| 43 | 2 | GUMXAO | 88 | GUMXAO 00 | $P_{2_1/c}$       | 2 | 50 | GUMXAO 00-02   | 0.5164 |
|    |   |        | 89 | GUMXAO 02 | $p\bar{1}$        | 2 |    |                |        |
| 44 | 2 | HIRYIR | 90 | HIRYIR 00 | $P_{2_1/c}$       | 2 | 51 | HIRYIR 00-01   | 0.1920 |
|    |   |        | 91 | HIRYIR 01 | $C_{2/c}$         | 2 |    |                |        |
| 45 | 2 | HUDHUK | 92 | HUDHUK 00 | $C_c$             | 2 | 52 | HUDHUK 00-01   | 0.2128 |
|    |   |        | 93 | HUDHUK 01 | $p\bar{1}$        | 2 |    |                |        |



|    |   |        |     |           |               |   |    |                |        |
|----|---|--------|-----|-----------|---------------|---|----|----------------|--------|
| 46 | 2 | HUKHUQ | 94  | HUKHUQ 00 | $P_{2_1/n}$   | 6 | 53 | HUKHUQ 00 - 01 | 0.8252 |
|    |   |        | 95  | HUKHUQ 01 | $P_{2_1/c}$   | 2 |    |                |        |
| 47 | 2 | IBIJAF | 96  | IBIJAF 00 | $I_2/a$       | 2 | 54 | IBIJAF 00-01   | 0.1627 |
|    |   |        | 97  | IBIJAF 01 | $P_1$         | 4 |    |                |        |
| 48 | 2 | IDOBAG | 98  | IDOBAG 00 | $p\bar{1}$    | 3 | 55 | IDOBAG 00-01   | 0.8226 |
|    |   |        | 99  | IDOBAG 01 | $P_{2_1/c}$   | 2 |    |                |        |
| 49 | 2 | ISAZOS | 100 | ISAZOS 00 | $C_2/c$       | 3 | 56 | ISAZOS 00 - 01 | 0.8536 |
|    |   |        | 101 | ISAZOS 01 | $C_2/c$       | 3 |    |                |        |
| 50 | 2 | ISUNAL | 102 | ISUNAL 00 | $p\bar{1}$    | 2 | 57 | ISUNAL 00-01   | 0.4994 |
|    |   |        | 103 | ISUNAL 01 | $P_{2_1/c}$   | 2 |    |                |        |
| 51 | 2 | JECXOH | 104 | JECXOH 00 | $P_{2_1/c}$   | 2 | 58 | JECXOH 00      | 0.4708 |
|    |   |        | 105 | JECXOH 01 | $p\bar{1}$    | 2 |    |                |        |
| 52 | 2 | JETLEA | 106 | JETLEA 00 | $Pca_2_1$     | 2 | 59 | JETLEA 00-01   | 0.0965 |
|    |   |        | 107 | JETLEA 01 | $P_{2_1}$     | 2 |    |                |        |
| 53 | 2 | JIMVUW | 108 | JIMVUW 00 | $P_{2_1}$     | 2 | 60 | JIMVUW 00-01   | 0.0320 |
|    |   |        | 109 | JIMVUW 01 | $P_{2_1/a}$   | 2 |    |                |        |
| 54 | 2 | JOWPAO | 110 | JOWPAO 00 | $p\bar{1}$    | 2 | 61 | JOWPAO 00-01   | 0.3305 |
|    |   |        | 111 | JOWPAO 01 | $Pbc_2_1$     | 2 |    |                |        |
| 55 | 2 | KAMCOQ | 112 | KAMCOQ 00 | $P_{2_1/c}$   | 2 | 62 | KAMCOQ 00-01   | 0.7557 |
|    |   |        | 113 | KAMCOQ 01 | $p\bar{1}$    | 2 |    |                |        |
| 56 | 2 | KASSOM | 114 | KASSOM 00 | $P_{2_1/a}$   | 2 | 63 | KASSOM 00-01   | 0.6712 |
|    |   |        | 115 | KASSOM 01 | $p\bar{1}$    | 2 |    |                |        |
| 57 | 4 | KELNIA | 116 | KELNIA 00 | $P_{2_1}$     | 2 | 64 | KELNIA 00-01   | 1.0228 |
|    |   |        | 117 | KELNIA 01 | $P_1$         | 2 | 65 | KELNIA 00-06   | 1.0569 |
|    |   |        | 118 | KELNIA 06 | $P_{2_1}$     | 2 | 66 | KELNIA 00-07   | 1.0443 |
|    |   |        | 119 | KELNIA 07 | $P_1$         | 2 | 67 | KELNIA 01-06   | 1.0681 |
|    |   |        |     |           |               |   | 68 | KELNIA 01-07   | 1.0556 |
|    |   |        |     |           |               |   | 69 | KELNIA 06-07   | 1.0170 |
| 58 | 2 | KETDUI | 120 | KETDUI 00 | $P_{2_1}$     | 2 | 70 | KETDUI 00-01   | 0.6453 |
|    |   |        | 121 | KETDUI 01 | $P_{2_1,2_1}$ | 2 |    |                |        |
| 59 | 2 | KUCYOY | 122 | KUCYOY 00 | $P_{2_1}$     | 2 | 71 | KUCYOY 00-01   | 1.0953 |
|    |   |        | 123 | KUCYOY 01 | $P_{2_1}$     | 2 |    |                |        |
| 60 | 2 | KUPMUE | 124 | KUPMUE 00 | $p\bar{1}$    | 4 | 72 | KUPMUE 00-01   | 0.1134 |
|    |   |        | 125 | KUPMUE 01 | $P_{2_1}$     | 4 |    |                |        |
| 61 | 2 | LAFKAE | 126 | LAFKAE 00 | $p\bar{1}$    | 2 | 73 | LAFKAE 00-01   | 0.0596 |
|    |   |        | 127 | LAFKAE 01 | $p\bar{1}$    | 2 |    |                |        |
| 62 | 2 | LAJZON | 128 | LAJZON 00 | $P_{2_1/c}$   | 2 | 74 | LAJZON 00-01   | 0.0891 |
|    |   |        | 129 | LAJZON 01 | $P_{2_1/n}$   | 2 |    |                |        |
| 63 | 2 | LEQPIH | 130 | LEQPIH 00 | $P_{2_1}$     | 2 | 75 | LEQPIH 00-01   | 0.1496 |
|    |   |        | 131 | LEQPIH 01 | $p\bar{1}$    | 2 |    |                |        |
| 64 | 2 | LEZPAH | 132 | LEZPAH 00 | $Pca_2_1$     | 2 | 76 | LEZPAH 00-01   | 0.1127 |
|    |   |        | 133 | LEZPAH 01 | $P_{2_1/c}$   | 2 |    |                |        |
| 65 | 2 | LISLEU | 134 | LISLEU 02 | $P_{2_1}$     | 2 | 77 | LISLEU 02-03   | 0.9306 |
|    |   |        | 135 | LISLEU 03 | $P_{2_1}$     | 4 |    |                |        |
| 66 | 2 | LOQQEN | 136 | LOQQEN 00 | $p\bar{1}$    | 2 | 78 | LOQQEN 00-01   | 0.0236 |
|    |   |        | 137 | LOQQEN 01 | $P_{2_1}$     | 2 |    |                |        |
| 67 | 2 | LUKXAQ | 138 | LUKXAQ 00 | $P_{2_1}$     | 2 | 79 | LUKXAQ 00-01   | 0.3205 |
|    |   |        | 139 | LUKXAQ 01 | $P_{2_1}$     | 2 |    |                |        |
| 68 | 2 | MEDLUE | 140 | MEDLUE 00 | $Pbca$        | 2 | 80 | MEDLUE 00-01   | 0.1294 |
|    |   |        | 141 | MEDLUE 01 | $P_{2_1/n}$   | 2 |    |                |        |
| 69 | 2 | MELXEG | 142 | MELXEG 00 | $P_{2_1}$     | 3 | 81 | MELXEG 00-01   | 1.3333 |
|    |   |        | 143 | MELXEG 01 | $P_{2_1,2_1}$ | 2 |    |                |        |
| 70 | 2 | MERHOG | 144 | MERHOG 00 | $P_{2_1,2_1}$ | 2 | 82 | MERHOG 00-01   | 0.5113 |
|    |   |        | 145 | MERHOG 01 | $C_2$         | 2 |    |                |        |
| 71 | 2 | MOKYER | 146 | MOKYER 00 | $C_2/c$       | 2 | 83 | MOKYER 00-01   | 0.0092 |
|    |   |        | 147 | MOKYER 01 | $Pbca$        | 2 |    |                |        |
| 72 | 2 | MOVXIF | 148 | MOVXIF 00 | $p\bar{1}$    | 4 | 84 | MOVXIF 00-01   | 0.3518 |
|    |   |        | 149 | MOVXIF 01 | $p\bar{1}$    | 2 |    |                |        |
| 73 | 2 | NAKQOG | 150 | NAKQOG 00 | $P_{2_1/c}$   | 2 | 85 | NAKQOG 00-01   | 0.0386 |
|    |   |        | 151 | NAKQOG 01 | $Pna_2_1$     | 2 |    |                |        |
| 74 | 2 | NEMLOG | 152 | NEMLOG 00 | $P_{2_1/n}$   | 2 | 86 | NEMLOG 00-02   | 1.2661 |
|    |   |        | 153 | NEMLOG 02 | $P_{2_1/c}$   | 2 |    |                |        |
| 75 | 3 | NENNUP | 154 | NENNUP 01 | $p\bar{1}$    | 2 | 87 | NENNUP 01-02   | 0.1281 |
|    |   |        | 155 | NENNUP 02 | $P_{2_1/c}$   | 2 |    |                |        |
| 76 | 4 | NIMRIK | 156 | NIMRIK 01 | $p\bar{1}$    | 3 | 88 | NIMRIK 01-08   | 0.0955 |
|    |   |        | 157 | NIMRIK 08 | $C_2/c$       | 6 |    |                |        |
| 77 | 2 | OBARIV | 158 | OBARIV 00 | $P_{2_1}$     | 4 | 89 | OBARIV 00-01   | 1.1009 |
|    |   |        | 159 | OBARIV 01 | $P_1$         | 2 |    |                |        |

|     |   |        |     |           |                   |      |     |              |        |
|-----|---|--------|-----|-----------|-------------------|------|-----|--------------|--------|
|     |   |        | 160 | OBARIV 04 | $P_1$             | 4    | 91  | OBARIV 01-04 | 1.0518 |
| 78  | 2 | ONITAN | 161 | ONITAN 02 | $P_{2_1/n}$       | 2    | 92  | ONITAN 02-03 | 0.0418 |
|     |   |        | 162 | ONITAN 03 | $P_{2_1/c}$       | 2    |     |              |        |
| 79  | 2 | PAMTAY | 163 | PAMTAY 00 | $p_1$             | 3    | 93  | PAMTAY 00-01 | 0.1199 |
|     |   |        | 164 | PAMTAY 01 | $P_{6_1}$         | 3    |     |              |        |
| 80  | 2 | PEJCAJ | 165 | PEJCAJ 00 | $P_{2_1/c}$       | 2    | 94  | PEJCAJ 00-01 | 0.2495 |
|     |   |        | 166 | PEJCAJ 01 | $P_{2_1/n}$       | 2    |     |              |        |
| 81  | 2 | PILRAG | 167 | PILRAG 00 | $P_{na21}$        | 2    | 95  | PILRAG 00-01 | 0.0699 |
|     |   |        | 168 | PILRAG 01 | $P_{2_1/c}$       | 2    |     |              |        |
| 82  | 2 | PINCOL | 169 | PINCOL 01 | $P_{6_5}$         | 2    | 96  | PINCOL 01-02 | 1.1804 |
|     |   |        | 170 | PINCOL 02 | $C_{2/c}$         | 3    |     |              |        |
| 83  | 2 | PODQIJ | 171 | PODQIJ 00 | $C_{2/c}$         | 2    | 97  | PODQIJ 00-01 | 0.5350 |
|     |   |        | 172 | PODQIJ 01 | $C_c$             | 2    |     |              |        |
| 84  | 2 | PUVVUX | 173 | PUVVUX 00 | $P_{2_1/a}$       | 2    | 98  | PUVVUX 00-01 | 0.0266 |
|     |   |        | 174 | PUVVUX 01 | $P_{ca2_1}$       | 2    |     |              |        |
| 85  | 2 | PYDSYD | 175 | PYDSYD 10 | $P_{2/c}$         | 2    | 99  | PYDSYD 10-11 | 0.0807 |
|     |   |        | 176 | PYDSYD 11 | $P_{2_1/c}$       | 2    |     |              |        |
| 86  | 2 | QIDVII | 177 | QIDVII 00 | $p_1$             | 2    | 100 | QIDVII 00-01 | 1.4472 |
|     |   |        | 178 | QIDVII 01 | $P_{2_1,2_1,2_1}$ | 2    |     |              |        |
| 87  | 2 | QIJTOS | 179 | QIJTOS 00 | $P_{2_1}$         | 2    | 101 | QIJTOS 00-01 | 0.5401 |
|     |   |        | 180 | QIJTOS 01 | $P_{2_1}$         | 2    |     |              |        |
| 88  | 2 | QIXZAY | 181 | QIXZAY 02 | $P_{2_1/n}$       | 2    | 102 | QIXZAY 02-03 | 0.0760 |
|     |   |        | 182 | QIXZAY 03 | $P_{2_1/c}$       | 2    |     |              |        |
| 89  | 2 | QUBPIN | 183 | QUBPIN 00 | $P_1$             | 2    | 103 | QUBPIN 00-02 | 0.0517 |
|     |   |        | 184 | QUBPIN 02 | $P_1$             | 2    |     |              |        |
| 90  | 3 | QUZREJ | 185 | QUZREJ 00 | $p_1$             | 2    | 104 | QUZREJ 00-02 | 0.2302 |
|     |   |        | 186 | QUZREJ 02 | $p_1$             | 2    | 105 | QUZREJ 00-03 | 0.2522 |
|     |   |        | 187 | QUZREJ 03 | $p_1$             | 2    | 106 | QUZREJ 02-03 | 0.2050 |
| 91  | 2 | REKJOH | 188 | REKJOH 00 | $P_{2_1}$         | 8    | 107 | REKJOH 00-01 | 0.0733 |
|     |   |        | 189 | REKJOH 01 | $P_{2_1/c}$       | 4    |     |              |        |
| 92  | 3 | REZQOF | 190 | REZQOF 00 | $P_{2_1}$         | 3    | 108 | REZQOF 00-02 | 0.1006 |
|     |   |        | 191 | REZQOF 02 | $p_1$             | 6    | 109 | REZQOF 00-03 | 0.0807 |
|     |   |        | 192 | REZQOF 03 | $P_{2_1/c}$       | 3    | 110 | REZQOF 02-03 | 0.0840 |
| 93  | 2 | RIFMUQ | 193 | RIFMUQ 00 | $P_{2_1}$         | 2    | 111 | RIFMUQ 00-01 | 0.1031 |
|     |   |        | 194 | RIFMUQ 01 | $P_{2_1}$         | 2    |     |              |        |
| 94  | 2 | RITBED | 195 | RITBED 00 | $p_1$             | 2    | 112 | RITBED 00-01 | 0.4595 |
|     |   |        | 196 | RITBED 01 | $P_{2_1/c}$       | 2    |     |              |        |
| 95  | 2 | RIVFAE | 197 | RIVFAE 00 | $p_1$             | 3    | 113 | RIVFAE 00-01 | 0.3375 |
|     |   |        | 198 | RIVFAE 01 | $p_1$             | 2    |     |              |        |
| 96  | 2 | ROFVAK | 199 | ROFVAK 00 | $P_{2_1/c}$       | 2    | 114 | ROFVAK 00-01 | 0.1148 |
|     |   |        | 200 | ROFVAK 01 | $p_1$             | 2    |     |              |        |
| 97  | 2 | SAPVAI | 201 | SAPVAI 00 | $P_{2_1}$         | 4    | 115 | SAPVAI 00-01 | 0.3889 |
|     |   |        | 202 | SAPVAI 01 | $P_{2_1,2_1,2_1}$ | 2    |     |              |        |
| 98  | 2 | SIDHOD | 203 | SIDHOD 00 | $P_{ca2_1}$       | 2    | 116 | SIDHOD 00-01 | 0.2381 |
|     |   |        | 204 | SIDHOD 01 | $P_{2_1/c}$       | 2    |     |              |        |
| 99  | 3 | SOBPEE | 205 | SOBPEE 00 | $p_1$             | 2    | 117 | SOBPEE 00-01 | 0.1248 |
|     |   |        | 206 | SOBPEE 01 | $p_1$             | 2    | 118 | SOBPEE 00-02 | 0.2843 |
|     |   |        | 207 | SOBPEE 02 | $p_1$             | 2    | 119 | SOBPEE 01-02 | 0.2638 |
| 100 | 2 | SOBSUX | 208 | SOBSUX 00 | $I_{4_1/a}$       | 2    | 120 | SOBSUX 00-01 | 0.1312 |
|     |   |        | 209 | SOBSUX 01 | $P_{2_1/n}$       | 2    |     |              |        |
| 101 | 2 | SUZYES | 210 | SUZYES 00 | $P_{2_1/c}$       | 2    | 121 | SUZYES 00-01 | 0.3091 |
|     |   |        | 211 | SUZYES 01 | $P_{2_1}$         | 4    |     |              |        |
| 102 | 2 | TAJVAC | 212 | TAJVAC 00 | $C_{2/c}$         | 2    | 122 | TAJVAC 00-01 | 0.3394 |
|     |   |        | 213 | TAJVAC 01 | $p_1$             | 4    |     |              |        |
| 103 | 2 | TAJVIK | 214 | TAJVIK 00 | $p_3$             | 1.17 | 123 | TAJVIK 00-01 | 0.8570 |
|     |   |        | 215 | TAJVIK 01 | $p_1$             | 2.5  |     |              |        |
| 104 | 2 | TAPZIT | 216 | TAPZIT 01 | $P_n$             | 4    | 124 | TAPZIT 01-02 | 0.0421 |
|     |   |        | 217 | TAPZIT 02 | $P_{2_1/c}$       | 2    |     |              |        |
| 105 | 3 | TAWRIT | 218 | TAWRIT 01 | $p_1$             | 2    | 126 | TAWRIT 00-02 | 0.6755 |
|     |   |        | 219 | TAWRIT 02 | $P_{2_1/n}$       | 2    | 127 | TAWRIT 01-02 | 0.1524 |
| 106 | 2 | TELRAG | 220 | TELRAG 00 | $p_1$             | 2    | 128 | TELRAG 00-02 | 0.6231 |
|     |   |        | 221 | TELRAG 02 | $p_1$             | 2    |     |              |        |
| 107 | 2 | TEMBES | 222 | TEMBES 00 | $P_{2_1/c}$       | 3    | 129 | TEMBES 00-01 | 0.0297 |
|     |   |        | 223 | TEMBES 01 | $P_{ca2_1}$       | 2    |     |              |        |
| 108 | 2 | TINBIB | 224 | TINBIB 00 | $P_{2_1,2_1,2_1}$ | 2    | 130 | TINBIB 00-01 | 0.9332 |
|     |   |        | 225 | TINBIB 01 | $P_{2_1}$         | 2    |     |              |        |
| 109 | 2 | TIVXUS | 226 | TIVXUS 00 | $P_{2_1}$         | 2    | 131 | TIVXUS 00-01 | 0.0191 |

|     |   |        |     |           |               |     |     |                |        |
|-----|---|--------|-----|-----------|---------------|-----|-----|----------------|--------|
|     |   |        | 227 | TIVXUS 01 | $P_{2_1/n}$   | 2   |     |                |        |
| 110 | 2 | TOLPHO | 228 | TOLPHO 10 | $P_{2_1/c}$   | 3   | 132 | TOLPHO 10-11   | 0.1537 |
|     |   |        | 229 | TOLPHO 11 | $\rho\bar{1}$ | 2   |     |                |        |
| 111 | 2 | TPPHSE | 230 | TPPHSE 01 | $\rho\bar{1}$ | 2   | 133 | TPPHSE 01-02   | 0.0507 |
|     |   |        | 231 | TPPHSE 02 | $P_{2_1/c}$   | 2   |     |                |        |
| 112 | 2 | UHENUQ | 232 | UHENUQ 00 | $\rho\bar{1}$ | 6   | 134 | UHENUQ 00-01   | 0.2945 |
|     |   |        | 233 | UHENUQ 01 | $C_{2/c}$     | 3   |     |                |        |
| 113 | 2 | UNEWIU | 234 | UNEWIU 00 | $\rho\bar{1}$ | 4   | 135 | UNEWIU 00-01   | 0.3719 |
|     |   |        | 235 | UNEWIU 01 | $P_{2_1/n}$   | 2   |     |                |        |
| 114 | 2 | UXIZAD | 236 | UXIZAD 00 | Pbca          | 3   | 136 | UXIZAD 00-01   | 0.2197 |
|     |   |        | 237 | UXIZAD 01 | $P_{2_1/c}$   | 2   |     |                |        |
| 115 | 2 | VAXZIF | 238 | VAXZIF 00 | $C_{2/c}$     | 2   | 137 | VAXZIF 00-01   | 0.215  |
|     |   |        | 239 | VAXZIF 01 | $\rho\bar{1}$ | 2   |     |                |        |
| 116 | 2 | VIMJIM | 240 | VIMJIM 00 | $P_{2_1/c}$   | 2   | 138 | VIMJIM 00-01   | 0.1697 |
|     |   |        | 241 | VIMJIM 01 | $P_{2_1/c}$   | 2   |     |                |        |
| 117 | 2 | VIZHIW | 242 | VIZHIW 00 | $P_{2_1/n}$   | 2   | 139 | VIZHIW 00-02   | 0.3463 |
|     |   |        | 243 | VIZHIW 01 | $C_c$         | 1.5 |     |                |        |
| 118 | 3 | VUXZEU | 244 | VUXZEU 00 | $P_{2_1/c}$   | 2   | 140 | VUXZEU 00-01   | 0.1989 |
|     |   |        | 245 | VUXZEU 01 | $P_{2_1/c}$   | 2   | 141 | VUXZEU 00-02   | 0.4028 |
|     |   |        | 246 | VUXZEU 02 | $I_{4_1/a}$   | 2   | 142 | VUXZEU 01-02   | 0.2238 |
| 119 | 2 | WELHEA | 247 | WELHEA 01 | $\rho\bar{1}$ | 2   | 143 | WELHEA 01-02   | 0.1333 |
|     |   |        | 248 | WELHEA 02 | $C_{2/c}$     | 2   |     |                |        |
| 120 | 2 | WITDEK | 249 | WITDEK 00 | $\rho\bar{1}$ | 2   | 144 | WITDEK 00-01   | 0.2242 |
|     |   |        | 250 | WITDEK 01 | $\rho\bar{1}$ | 2   |     |                |        |
| 121 | 2 | XELLOP | 251 | XELLOP 00 | $\rho\bar{1}$ | 2   | 145 | XELLOP 00-01   | 0.0645 |
|     |   |        | 252 | XELLOP 01 | $P_{2_1}$     | 3   |     |                |        |
| 122 | 2 | XILQOY | 253 | XILQOY 00 | $P_{2_1/c}$   | 2   | 146 | XILQOY 00-01   | 1.4053 |
|     |   |        | 254 | XILQOY 01 | $\rho\bar{1}$ | 2   |     |                |        |
| 123 | 2 | XIMMEL | 255 | XIMMEL 00 | $P_{2_1}$     | 2   | 147 | XIMMEL 00-01   | 0.8720 |
|     |   |        | 256 | XIMMEL 01 | $P_{2_1/c}$   | 2   |     |                |        |
| 124 | 2 | XOCFOK | 257 | XOCFOK 00 | $C_{2/c}$     | 2   | 148 | XOCFOK 00-01   | 0.2349 |
|     |   |        | 258 | XOCFOK 01 | $C_{2/c}$     | 1.5 |     |                |        |
| 125 | 2 | YAJPUV | 259 | YAJPUV 00 | $C_{2/c}$     | 2   | 149 | YAJPUV 00-02   | 0.0297 |
|     |   |        | 260 | YAJPUV 02 | Pbca          | 2   |     |                |        |
| 126 | 2 | YASFIJ | 261 | YASFIJ 00 | $P_{2_1/n}$   | 2   | 150 | YASFIJ 00 - 01 | 0.7869 |
|     |   |        | 262 | YASFIJ 01 | $P_{2_1/n}$   | 2   |     |                |        |
| 127 | 2 | YAXWAX | 263 | YAXWAX 00 | $\rho\bar{1}$ | 3   | 151 | YAXWAX 00-01   | 0.0305 |
|     |   |        | 264 | YAXWAX 01 | $P_{2_1/c}$   | 2   |     |                |        |
| 128 | 2 | YIRXAZ | 265 | YIRXAZ 00 | $\rho\bar{1}$ | 2   | 152 | YIRXAZ 00-01   | 0.7580 |
|     |   |        | 266 | YIRXAZ 01 | $\rho\bar{1}$ | 2   |     |                |        |
| 129 | 2 | YUHTEA | 267 | YUHTEA 00 | $P_{2_1}$     | 4   | 153 | YUHTEA 00-04   | 0.0804 |
|     |   |        | 268 | YUHTEA 04 | $Pna_{2_1}$   | 4   |     |                |        |
| 130 | 3 | ZZZAUS | 269 | ZZZAUS 20 | $P_{2_1/c}$   | 3   | 154 | ZZZAUS 20-21   | 0.1504 |
|     |   |        | 270 | ZZZAUS 21 | Pbca          | 2   | 155 | ZZZAUS 20-22   | 0.1866 |
|     |   |        | 271 | ZZZAUS 22 | $\rho\bar{1}$ | 2   | 156 | ZZZAUS 21-22   | 0.1575 |
| 131 | 2 | ZZZJIQ | 272 | ZZZJIQ 01 | $\rho\bar{1}$ | 4   | 157 | ZZZJIQ 01-02   | 0.2090 |
|     |   |        | 273 | ZZZJIQ 02 | $P_{2_1/n}$   | 2   |     |                |        |
| 132 | 2 | ZZZMUC | 274 | ZZZMUC 08 | $P_{2_1/a}$   | 2   | 158 | ZZZMUC 08-09   | 0.0988 |
|     |   |        | 275 | ZZZMUC 09 | $Pca_{2_1}$   | 2   |     |                |        |
| 133 | 3 | ZZZVXQ | 276 | ZZZVXQ 02 | $P_{3_1}$     | 12  | 159 | ZZZVXQ 02-03   | 0.3778 |
|     |   |        | 277 | ZZZVXQ 03 | $\rho\bar{1}$ | 6   | 160 | ZZZVXQ 02-04   |        |
|     |   |        | 278 | ZZZVXQ 04 | $P_{6_3}$     | 3   | 161 | ZZZVXQ 03-04   | 0.2902 |
